# Supplementary material
Source: ML conference proceedings conference paper supplement (https://openaccess.thecvf.com/content/CVPR2022/html/Liu_Instance-Aware_Dynamic_Neural_CVPR_2022_paper.html)
Supplement: Supplementary file 1 [file Liu_Instance-Aware_Dynamic_Neural_CVPR_2022_supplemental.pdf]

# Supplementary Materials of Instance-Aware Dynamic Neural Network Quantization

Zhenhua Liu<sup>1,2</sup>, Yunhe Wang<sup>2</sup>, Kai Han<sup>2</sup>, Siwei Ma<sup>1,3</sup>, Wen Gao<sup>1,3</sup>

<sup>1</sup>National Engineering Research Center of Visual Technology, School of Computer Science, Peking University

<sup>2</sup>Huawei Noah's Ark Lab <sup>3</sup>Peng Cheng Laboratory

{liu-zh, swma, wgao}@pku.edu.cn, {yunhe.wang, kai.han}@huawei.com

## 1. Appendix

### 1.1. ResNet18 on ImageNet

We have shown the experimental results of ResNet18, which consists of a convolutional layer followed by 8 ResNet basic blocks. The results are shown in Table 1. DQNet can achieve 0.42% and 0.52% average top-1 accuracy gain over DoReFa and PACT.

Table 1. Comparison on the performance of proposed DQNet with PACT and DoReFa of ResNet18 on ImageNet dataset.

| Method  | Bit   | Bit-FLOPs(G) | Top-1 Accuracy(%) |
|---------|-------|--------------|-------------------|
| DoReFa  | 3     | 15.25        | 67.5              |
| DoReFa  | 4     | 27.11        | 68.1              |
| DoReFa  | 5     | 42.35        | 68.4              |
| Average | —     | 28.24        | 68.00             |
| DoReFa  | ~3 MP | 15.31        | 67.92             |
| DoReFa  | ~4 MP | 27.19        | 68.41             |
| DoReFa  | ~5 MP | 42.68        | 68.94             |
| Average | —     | 28.39        | <b>68.42</b>      |
| PACT    | 3     | 15.25        | 68.1              |
| PACT    | 4     | 27.11        | 69.2              |
| PACT    | 5     | 42.35        | 69.8              |
| Average | —     | 28.24        | 69.03             |
| PACT    | ~3 MP | 15.36        | 68.49             |
| PACT    | ~4 MP | 27.18        | 69.76             |
| PACT    | ~5 MP | 42.49        | 70.40             |
| Average | —     | 28.34        | <b>69.55</b>      |

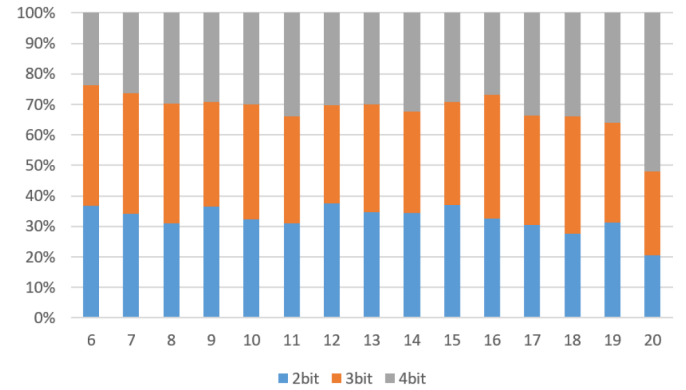

Figure 1. The bit-width distribution of each layer in ResNet-20 on CIFAR-10 dataset.

### 1.2. Effectiveness of bit-controller

We have shown the detailed bit-widths distribution of each layer for ResNet-20 on the validation set of CIFAR-10 in Figure 1. It is obvious that the bit controller produces various bit-widths for different samples, which demonstrates the effectiveness of the proposed bit-controller.
